# Supplementary material for: NOS Inhibition Modulates Immune Polarization and Improves Radiation-Induced Tumor Growth Delay
Source: Oxford University Press journal article supplement (doi:10.1158/0008-5472.can-14-3011), 2015-05-19
Supplement: 00085472can143011-sup-139236_2_supp_2946003_nn4gp4.docx [file 00085472can143011-sup-139236_2_supp_2946003_nn4gp4.docx]

Table I Th1 vs. Th2 Cytokine Trend

Time Post-IR 10 Gy Tumor 10 Gy + L-NAME Tumor

6 Hr IL-2 **(Th1)**

1 Day IL-10 **(Th2)** IL-2 **(Th1)**

2 IL-5 **(Th2)**

3 IL-2 (Th1) IFN- **(Th1)**

IL-4 **(Th2)**

IL-5 **(Th2)**

4 IL-1 (Th1) IL-12p40 **(Th1)**

IL-3 **(Th2)**

IL-4 **(Th2)**

7 IL-1 (Th1) IFN- **(Th1)**

IL-3 (Th2)

Table II Effect of L-NAME on Radiation-induced Cytokine Expression

pg/mg +/- SD

Time Cytokine 10 Gy 10 Gy+L-NAME p-value Fold-change

6 Hr IL-2 0.2 +/- 0.14 0.7 +/- 0.67 0.04 3.5

IL-5 0.5 +/- 0.18 0.3 +/- 0.05 0.04 1.7

1 Day IL-2 0.6 +/- 0.13 1.4 +/- 1.11 0.06 2.3

IL-10 4.16 +/- 0.9 0.11 +/- 0.0003 < 0.0001 38.0

IL-5 2.1 +/- 0.35 1.6 +/- 1.36 0.04 1.3

2 IL-5 1.8 +/- 0.22 0.3 +/- 0.09 < 0.0001 6.0

3 IL-2 0.8 +/- 0.62 0.2 +/- 0.16 0.01 4.0

IL-4 1.6 +/- 1.01 0.5 +/- 0.17 0.01 3.2

IL-5 2.7 +/- 0.97 0.9 +/- 0.61 0.002 3.0

IFN- 0.6 +/- 0.07 3.4 +/- 3.51 0.05 5.7

4 IL-1 20.2 +/- 18.8 2.5 +/- 0.31 0.02 8.1

IL-3 0.6 +/- 0.39 0.2 +/- 0.09 0.02 1.5

IL-4 1.3 +/- 0.72 0.4 +/- 0.18 0.01 3.3

IL-12p40 670.0 +/- 135.0 1424.0 +/- 491.0 0.002 2.1

7 IL-1 10.0 +/- 7.42 4.1 +/- 0.33 0.04 2.4

IFN- 5.6 +/- 0.47 10.8 +/- 6.79 0.04 1.9

IL-3 0.03 +/- 0.03 1.8 +/- 1.72 0.02 60.0
